# Supplementary material
Source: Springer Nature journal article supplement (https://www.springermedizin.de/resource/supplementary/12891_2009_732_MOESM3_ESM.pdf/9506282)

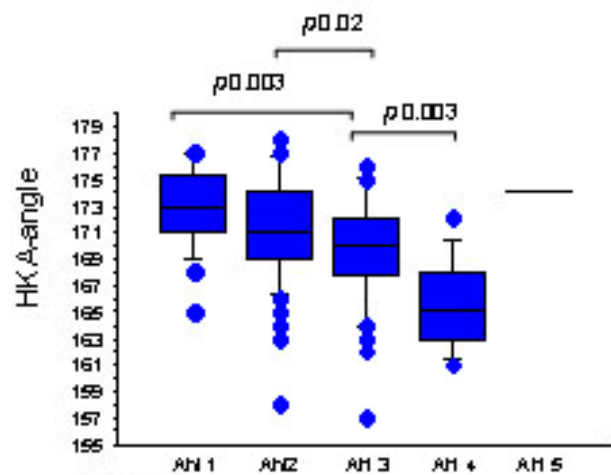

Figure 3a

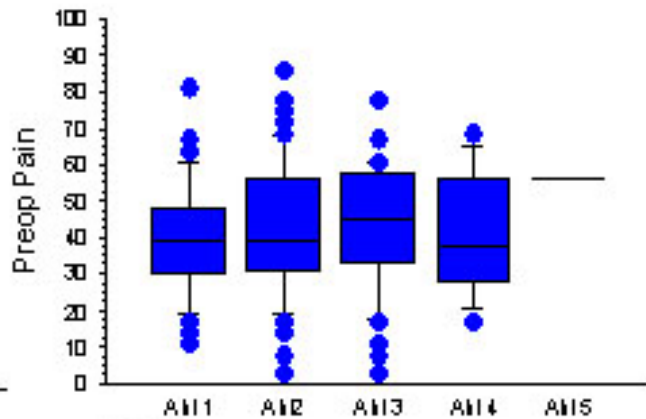

Figure 3b

Supplement: MOESM3 [file 9506282]
